# Supplementary material for: Analysis of Firearm Violence During the COVID-19 Pandemic in the US
Source: PubMed Central journal article supplement (PMC9051986; doi:10.1001/jamanetworkopen.2022.9393), 2022-04-28
Supplement: jamanetwopen-e229393-s001.pdf [file jamanetwopen-e229393-s001.pdf]

## Supplemental Online Content

Sun S, Cao W, Ge Y, Siegel M, Wellenius GA. Analysis of firearm violence during the COVID-19 pandemic in the United States. *JAMA Netw Open*. 2022;5(4):e229393. doi:10.1001/jamanetworkopen.2022.9393

**eTable 1.** The Quasi Akaike's Information Criterion by the Number of Knots for the Constrained Quadratic B-Spline for the Days From February 15, 2020, to February 28, 2021

**eTable 2.** The Annual Average Number of Firearm-Related Incidents, Non-fatal Injuries, and Deaths During the Study Period of 1 January 2016 to 28 February 2021 by State in the United States

**eTable 3.** Percent Excess Firearm Violence During the COVID-19 Pandemic in the 50 US States and the District of Columbia Using Different Spline Functions and Degrees of Freedom (dfs) for the Days From February 15, 2020, to February 28, 2021

**eTable 4.** Number of Firearm Violence and Estimated Excess Number and Percent Excess During the Coronavirus Disease 2019 Period (i.e., 1 March 2020 to 28 February 2021) in City of Philadelphia Using Data from Philadelphia Police Department and Gun Violence Archive (GVA)

**eFigure 1.** The Number of Firearm-Related Events per Month per Million People Between January 1, 2018 and February 28, 2021 by State in the United States

**eFigure 2.** Temporal Trend in Excess Risk Associated With the COVID-19 Pandemic Period Using A Quadratic B-Spline (Main Model) and a Natural Spline With 3 Degrees of Freedom for the Days From February 15, 2020, to February 28, 2021 in the United States

**eFigure 3.** Temporal Trend in Excess Risk by State Associated With the COVID-19 Pandemic Period by State in the United States

**eFigure 4.** The Number Difference of Firearm-Related Events Between Data From Philadelphia Police Department and Gun Violence Archive (GVA)

**eFigure 5.** The Ratio of Number of Non-fatal to Fatal Incidents in GVA, January 1, 2016 to February 28, 2021

**eFigure 6.** Temporal Trend in Excess Risk in Firearm-related Incidents (A), Non-fatal Injuries (B), and Deaths (C) During the Pandemic Period in the City of Philadelphia

Using Data From Gun Violence Archive (GVA) and Philadelphia Police Department (PPD)

## **eReferences**

This supplemental material has been provided by the authors to give readers additional information about their work.

**eTable 1. The Quasi Akaike’s Information Criterion by the number of knots for the constrained quadratic B-spline for the days from February 15, 2020, to February 28, 2021.**

| Number of knots | Firearm-related incidents | Firearm-related non-fatal injuries | Firearm-related deaths |
|-----------------|---------------------------|------------------------------------|------------------------|
| 1               | 330889.8                  | 277604                             | <b>200134.5</b>        |
| 2               | 330724.2                  | 277605                             | 200202.4               |
| 3               | 330562.4                  | <b>277570.2</b>                    | 200261.9               |
| 4               | 330563.1                  | 277605.3                           | 200328.6               |
| 5               | 330578.8                  | 277753.6                           | 200381.2               |
| 6               | <b>330551.5</b>           | 277776.3                           | 200415.3               |
| 7               | 330613.8                  | 277859.1                           | 200473                 |
| 8               | 330649.9                  | 277947.6                           | 200524.3               |
| 9               | 330692.5                  | 278063.3                           | 200601.9               |
| 10              | 330725.7                  | 278115.8                           | 200669.9               |
| 11              | 330723                    | 278145.1                           | 200698.4               |
| 12              | 330739.8                  | 278223.4                           | 200776.6               |
| 13              | 330836                    | 278365.3                           | 200800.9               |
| 14              | 330885.4                  | 278460.5                           | 200834.8               |

**eTable 2. The annual average number of firearm-related incidents, non-fatal injuries, and deaths during the study period of 1 January 2016 to 28 February 2021 by state in the United States.**

| Jurisdiction         | Firearm-related incidents |                 | Firearm-related non-fatal injuries |                 | Firearm-related deaths |                 |
|----------------------|---------------------------|-----------------|------------------------------------|-----------------|------------------------|-----------------|
|                      | No.                       | No. per 100,000 | No.                                | No. per 100,000 | No.                    | No. per 100,000 |
| Alabama              | 1,302                     | 26.6            | 777                                | 15.9            | 504                    | 10.3            |
| Alaska               | 225                       | 30.6            | 65                                 | 8.8             | 59                     | 8.0             |
| Arizona              | 636                       | 8.9             | 317                                | 4.4             | 314                    | 4.4             |
| Arkansas             | 720                       | 23.9            | 376                                | 12.5            | 218                    | 7.2             |
| California           | 3,699                     | 9.4             | 2,003                              | 5.1             | 1,394                  | 3.5             |
| Colorado             | 781                       | 13.7            | 351                                | 6.2             | 225                    | 3.9             |
| Connecticut          | 785                       | 22.0            | 357                                | 10.0            | 85                     | 2.4             |
| Delaware             | 376                       | 39.0            | 192                                | 19.9            | 53                     | 5.5             |
| District of Columbia | 688                       | 98.1            | 428                                | 60.9            | 135                    | 19.2            |
| Florida              | 3,430                     | 16.1            | 1,704                              | 8.0             | 1,027                  | 4.8             |
| Georgia              | 1,722                     | 16.4            | 937                                | 8.9             | 657                    | 6.3             |
| Hawaii               | 66                        | 4.6             | 21                                 | 1.5             | 22                     | 1.6             |
| Idaho                | 139                       | 8.0             | 37                                 | 2.1             | 42                     | 2.4             |
| Illinois             | 4,518                     | 35.5            | 3,533                              | 27.8            | 921                    | 7.2             |
| Indiana              | 1,456                     | 21.7            | 815                                | 12.2            | 433                    | 6.5             |
| Iowa                 | 550                       | 17.5            | 205                                | 6.5             | 72                     | 2.3             |
| Kansas               | 535                       | 18.4            | 260                                | 8.9             | 143                    | 4.9             |
| Kentucky             | 1,030                     | 23.1            | 529                                | 11.9            | 291                    | 6.5             |
| Louisiana            | 1,864                     | 40.0            | 1,158                              | 24.8            | 572                    | 12.3            |
| Maine                | 163                       | 12.2            | 33                                 | 2.5             | 27                     | 2.0             |
| Maryland             | 1,580                     | 26.2            | 933                                | 15.5            | 474                    | 7.8             |
| Massachusetts        | 1,306                     | 19.0            | 403                                | 5.9             | 118                    | 1.7             |
| Michigan             | 1,660                     | 16.6            | 996                                | 10.0            | 450                    | 4.5             |
| Minnesota            | 664                       | 11.8            | 317                                | 5.7             | 125                    | 2.2             |
| Mississippi          | 921                       | 30.9            | 532                                | 17.9            | 340                    | 11.4            |
| Missouri             | 1,626                     | 26.6            | 945                                | 15.4            | 609                    | 9.9             |
| Montana              | 127                       | 12.0            | 34                                 | 3.2             | 39                     | 3.7             |
| Nebraska             | 408                       | 21.2            | 157                                | 8.1             | 57                     | 2.9             |
| Nevada               | 430                       | 14.2            | 307                                | 10.1            | 197                    | 6.5             |
| New Hampshire        | 187                       | 13.8            | 33                                 | 2.4             | 23                     | 1.7             |
| New Jersey           | 1,196                     | 13.5            | 670                                | 7.5             | 252                    | 2.8             |
| New Mexico           | 402                       | 19.2            | 150                                | 7.1             | 149                    | 7.1             |
| New York             | 2,302                     | 11.8            | 1,336                              | 6.8             | 419                    | 2.1             |
| North Carolina       | 1,949                     | 18.8            | 1,170                              | 11.3            | 596                    | 5.7             |
| North Dakota         | 102                       | 13.5            | 28                                 | 3.7             | 18                     | 2.3             |
| Ohio                 | 2,559                     | 21.9            | 1,500                              | 12.8            | 682                    | 5.8             |
| Oklahoma             | 813                       | 20.6            | 405                                | 10.3            | 249                    | 6.3             |
| Oregon               | 470                       | 11.2            | 186                                | 4.4             | 110                    | 2.6             |

|                |        |      |        |      |        |     |
|----------------|--------|------|--------|------|--------|-----|
| Pennsylvania   | 2,652  | 20.7 | 1,757  | 13.7 | 658    | 5.1 |
| Rhode Island   | 174    | 16.4 | 67     | 6.3  | 17     | 1.6 |
| South Carolina | 1,469  | 28.9 | 792    | 15.6 | 432    | 8.5 |
| South Dakota   | 124    | 14.2 | 26     | 2.9  | 21     | 2.4 |
| Tennessee      | 1,824  | 26.9 | 1,126  | 16.6 | 534    | 7.9 |
| Texas          | 3,514  | 12.3 | 1,845  | 6.4  | 1,367  | 4.8 |
| Utah           | 237    | 7.5  | 97     | 3.1  | 71     | 2.3 |
| Vermont        | 80     | 12.7 | 14     | 2.2  | 14     | 2.2 |
| Virginia       | 1,463  | 17.2 | 964    | 11.3 | 403    | 4.7 |
| Washington     | 676    | 9.0  | 320    | 4.3  | 210    | 2.8 |
| West Virginia  | 343    | 19.0 | 146    | 8.1  | 93     | 5.2 |
| Wisconsin      | 1,163  | 20.0 | 638    | 11.0 | 220    | 3.8 |
| Wyoming        | 45     | 7.8  | 11     | 1.9  | 17     | 2.9 |
| United States  | 57,151 | 17.5 | 32,000 | 9.8  | 16,160 | 4.9 |

**eTable 3. Percent excess firearm violence during the COVID-19 pandemic in the 50 US states and the District of Columbia using different spline functions and degrees of freedom (dfs) for the days from February 15, 2020, to February 28, 2021. eCI=empirical confidence interval.**

| Spline function        | dfs            | Firearm-related incidents (95% eCI) | Firearm-related injuries (95% eCI) | Firearm-related deaths (95% eCI) |
|------------------------|----------------|-------------------------------------|------------------------------------|----------------------------------|
| Cubic B-spline         | 2 (Main model) | 15.0 (4.6 to 26.1)                  | 34.3 (26.1 to 41.1)                | 28.4 (12.9 to 46.2)              |
|                        | 3              | 15.3 (5.8 to 25.0)                  | 34.6 (24.5 to 43.2)                | 28.5 (15.2 to 43.2)              |
|                        | 4              | 15.3 (5.9 to 24.9)                  | 34.9 (20.5 to 49.2)                | 28.8 (13.4 to 44.4)              |
| Natural cubic B-spline | 3              | 15.6 (7.3 to 23.9)                  | 36.2 (20.8 to 52.7)                | 27.2 (10.8 to 46.4)              |
|                        | 4              | 15.6 (7.4 to 23.9)                  | 36.2 (20.8 to 52.7)                | 27.2 (10.8 to 46.4)              |
|                        | 5              | 15.6 (7.4 to 23.9)                  | 36.2 (20.9 to 52.7)                | 27.2 (10.8 to 46.4)              |

**eTable 4. Number of firearm violence and estimated excess number and percent excess during the coronavirus disease 2019 period (i.e., 1 March 2020 to 28 February 2021) in city of Philadelphia using data from Philadelphia Police Department and Gun Violence Archive (GVA). eCI=empirical confidence interval.**

| Characteristics                    | Philadelphia Police Department | Gun Violence Archive |
|------------------------------------|--------------------------------|----------------------|
| Firearm-related incidents          |                                |                      |
| Total                              | 2,324                          | 1,997                |
| Excess No. (95% eCI)               | 790 (635, 919)                 | 264 (99, 407)        |
| Excess % (95% eCI)                 | 51.5 (37.6, 65.5)              | 15.2 (5.2, 25.6)     |
| Firearm-related non-fatal injuries |                                |                      |
| Total                              | 2,410                          | 2,004                |
| Excess No. (95% eCI)               | 771 (611, 912)                 | 241 (26, 423)        |
| Excess % (95% eCI)                 | 47.0 (34.0, 60.9)              | 13.7 (1.3, 26.8)     |
| Firearm-related deaths             |                                |                      |
| Total                              | 442                            | 452                  |
| Excess No. (95% eCI)               | 89 (22, 138)                   | 90 (21, 141)         |
| Excess % (95% eCI)                 | 25.0 (5.3, 45.4)               | 24.8 (5.0, 45.4)     |

**eFigure 1. The number of firearm-related events per month per million people between January 1, 2018 and February 28, 2021 by state in the United States. COVID-19=coronavirus disease 2019.**

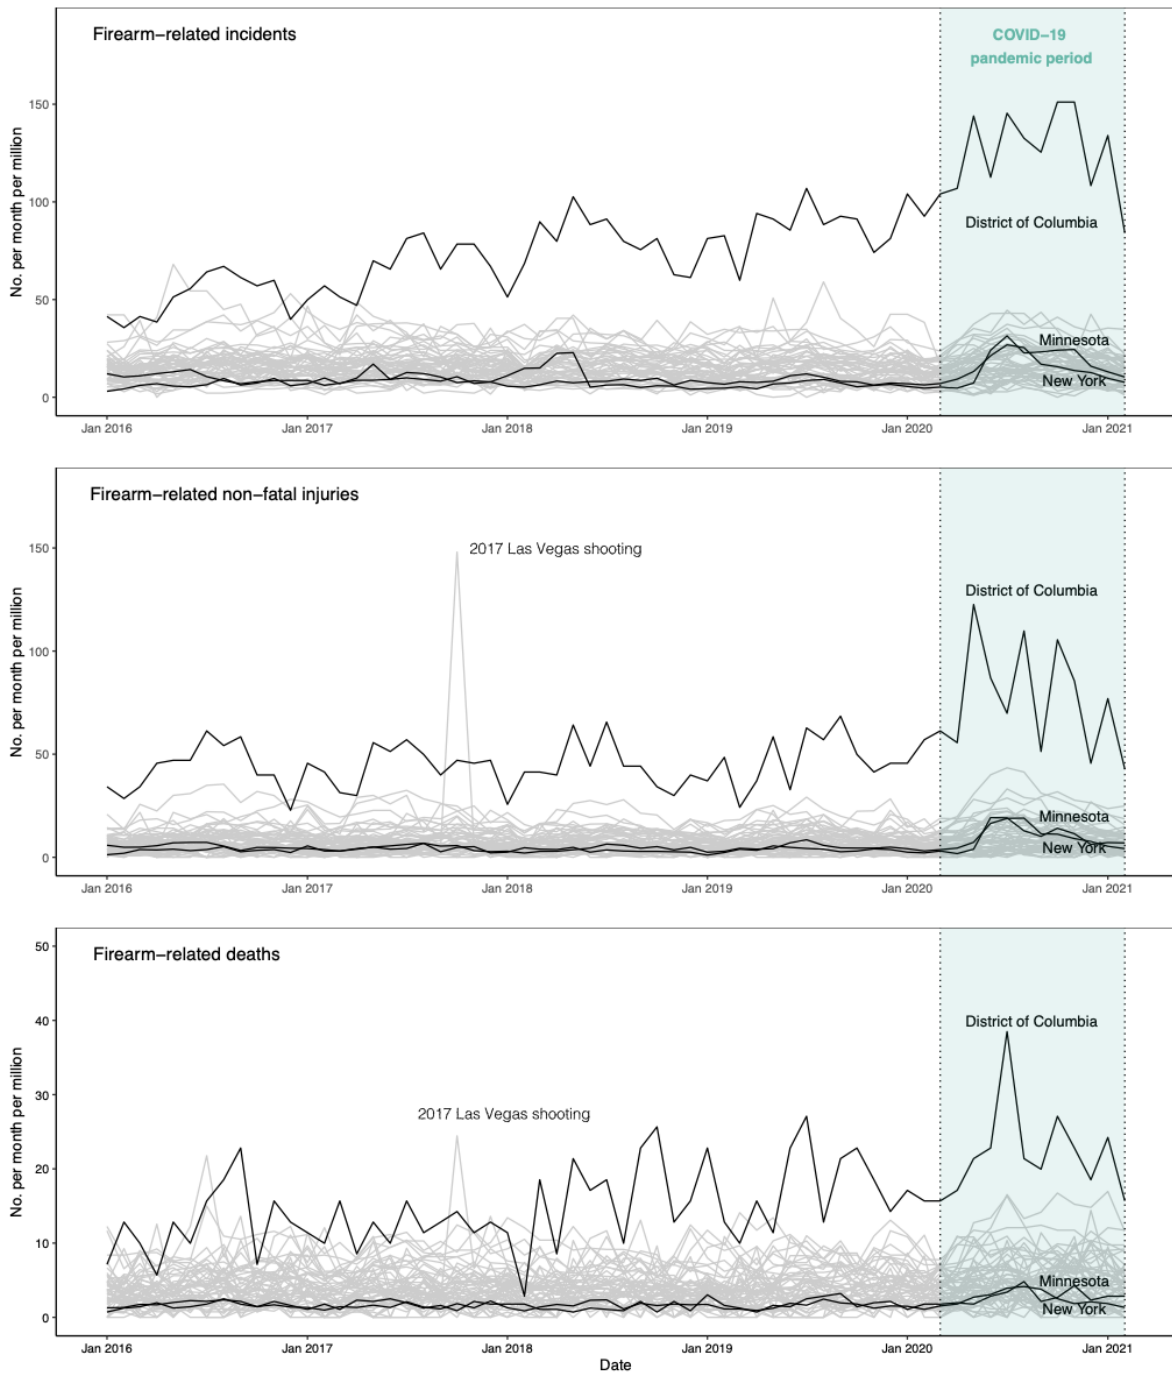



**eFigure 2. Temporal trend in excess risk associated with the COVID-19 pandemic period using a quadratic B-spline (main model) and a natural spline with 3 degrees of freedom for the days from February 15, 2020, to February 28, 2021 in the United States.**

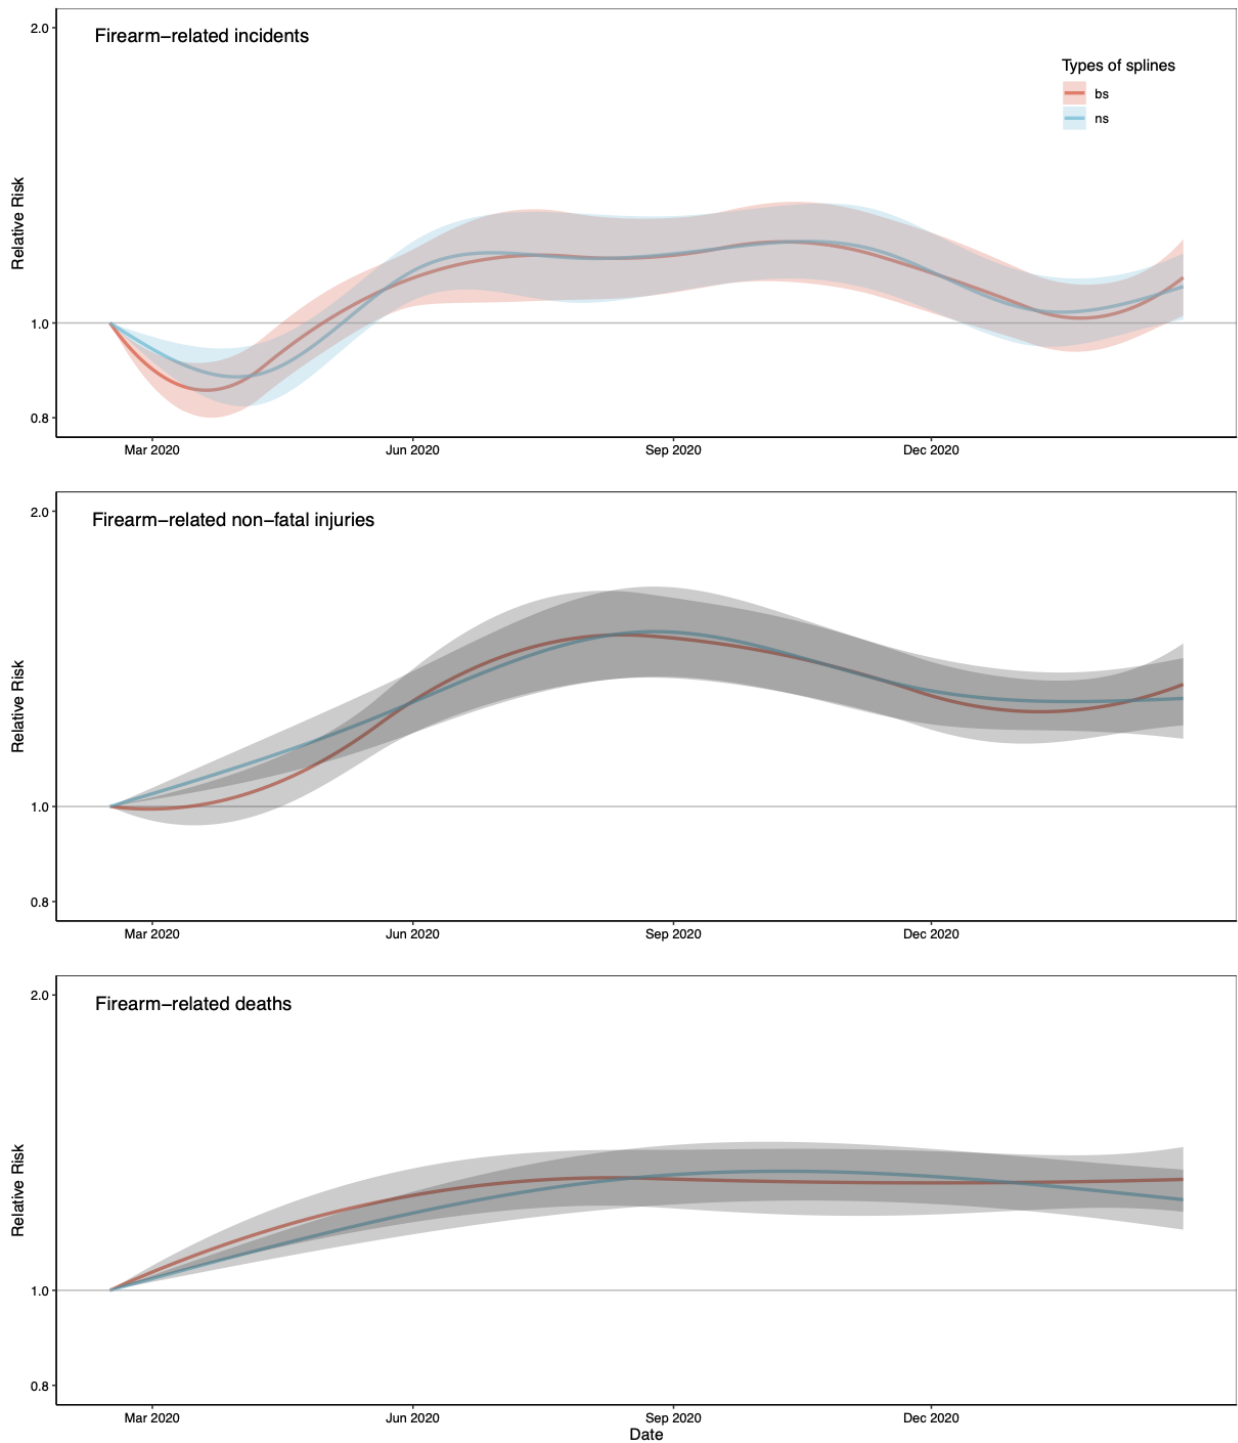

**eFigure 3. Temporal trend in excess risk by state associated with the COVID-19 pandemic period by state in the United States.**

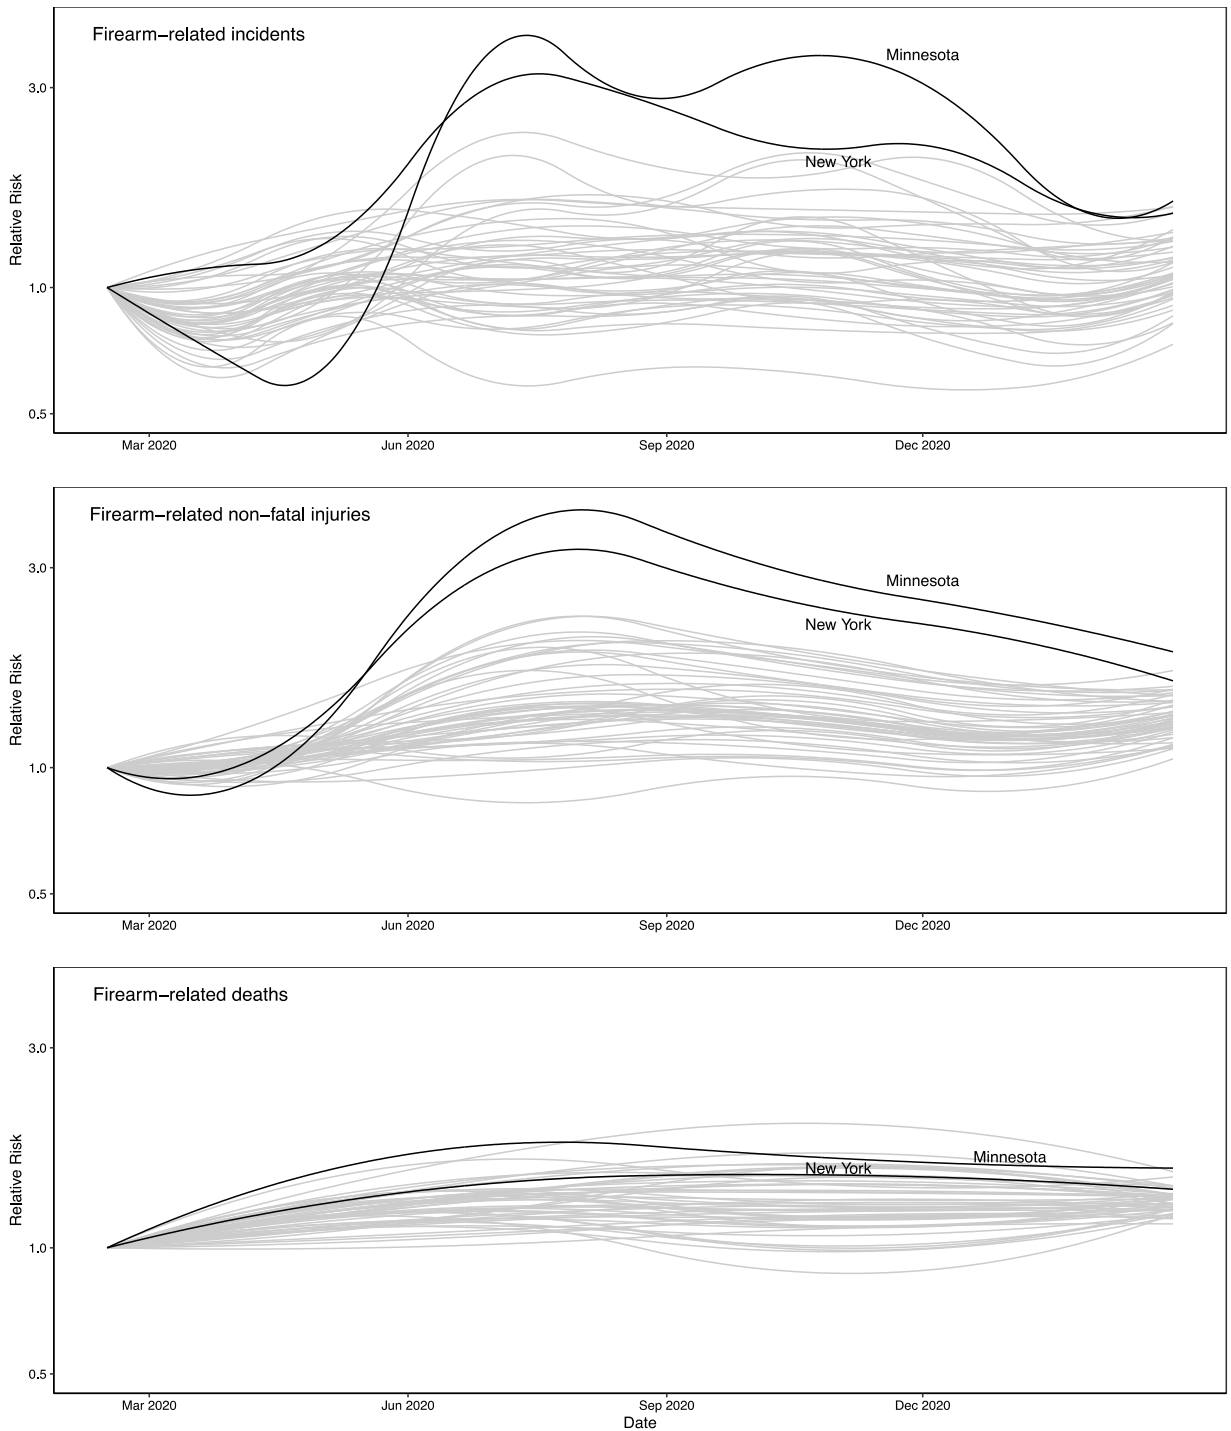

**eFigure 4. The number difference of firearm-related events between data from Philadelphia Police Department and Gun Violence Archive (GVA). The positive number represents how many events were recorded in Philadelphia Police Department but not in GVA.**

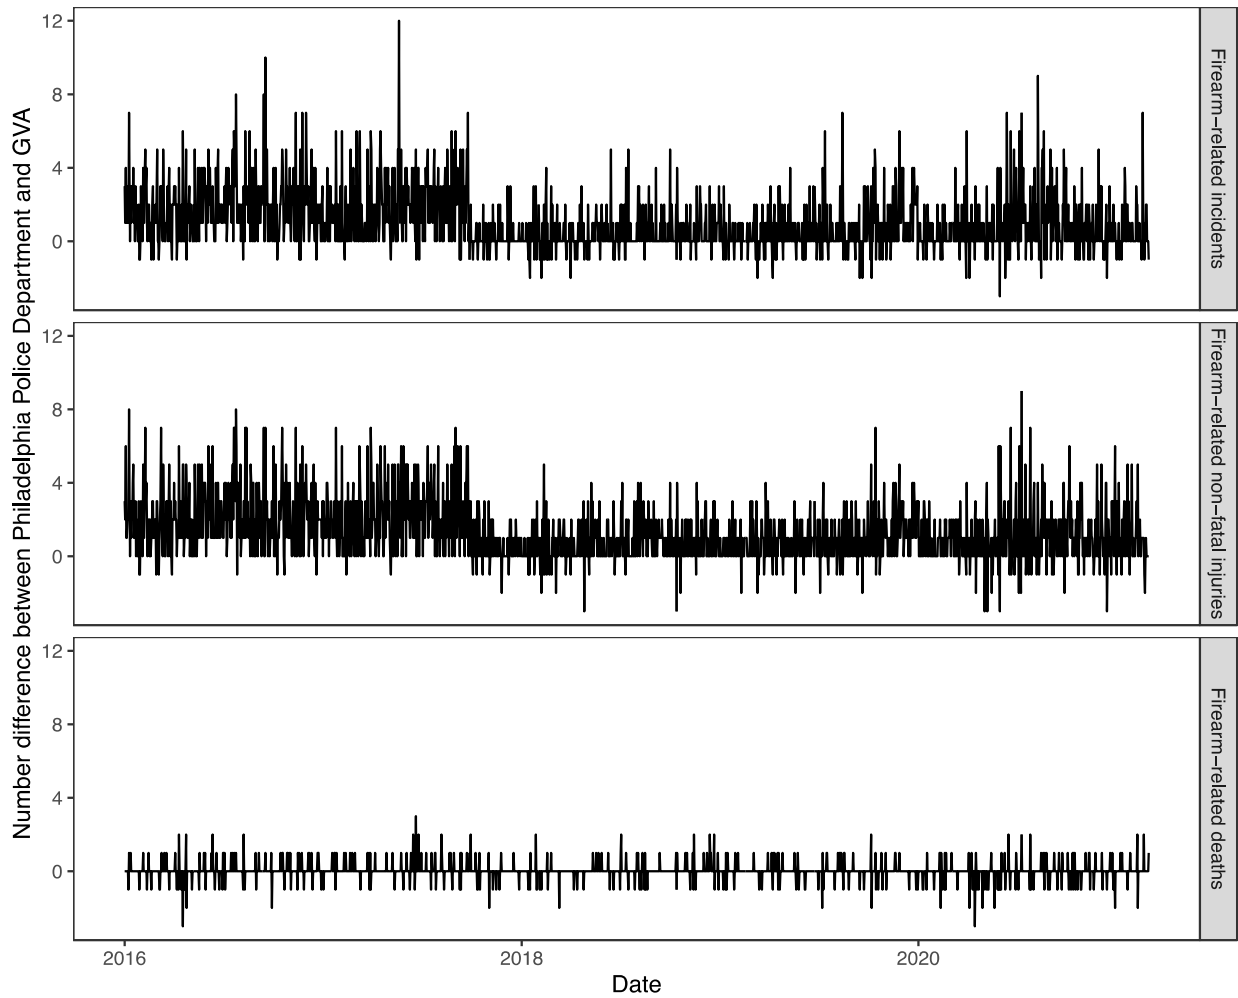

**eFigure 5. The ratio of number of non-fatal to fatal incidents in GVA, January 1, 2016 to February 28, 2021.**

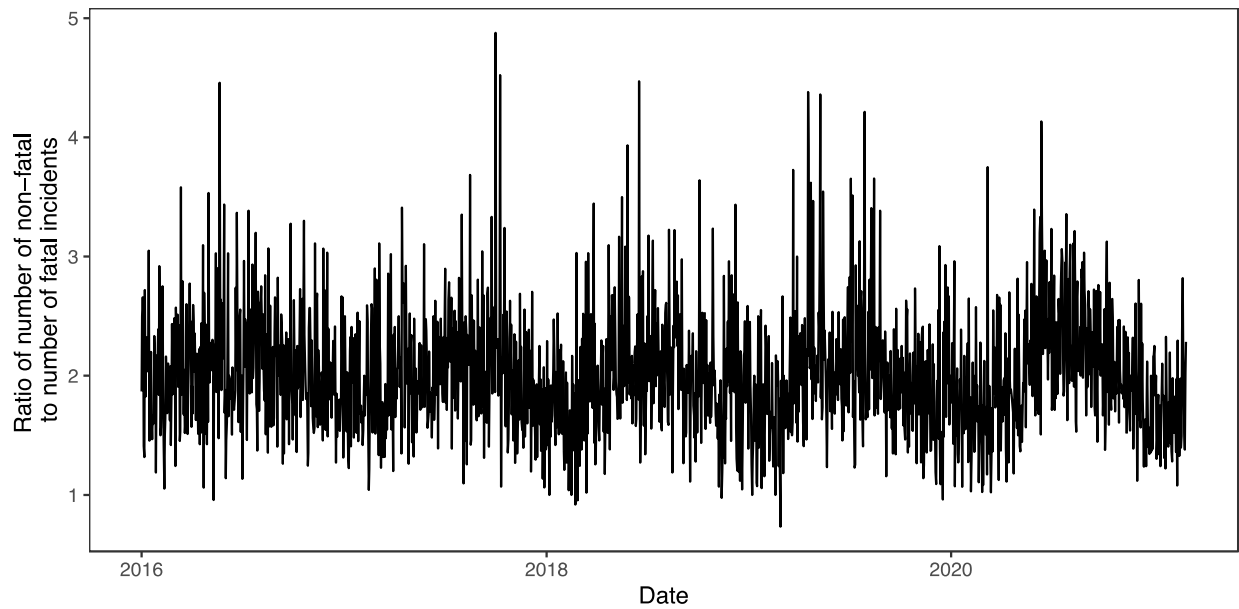

**eFigure 6. Temporal trend in excess risk in firearm-related incidents (A), non-fatal injuries (B), and deaths (C) during the pandemic period in the city of Philadelphia using data from Gun Violence Archive (GVA) and Philadelphia Police Department (PPD). Each line represents the temporal trend in excess risk for each state. The band is the 95% confidence interval for the excess risk.**

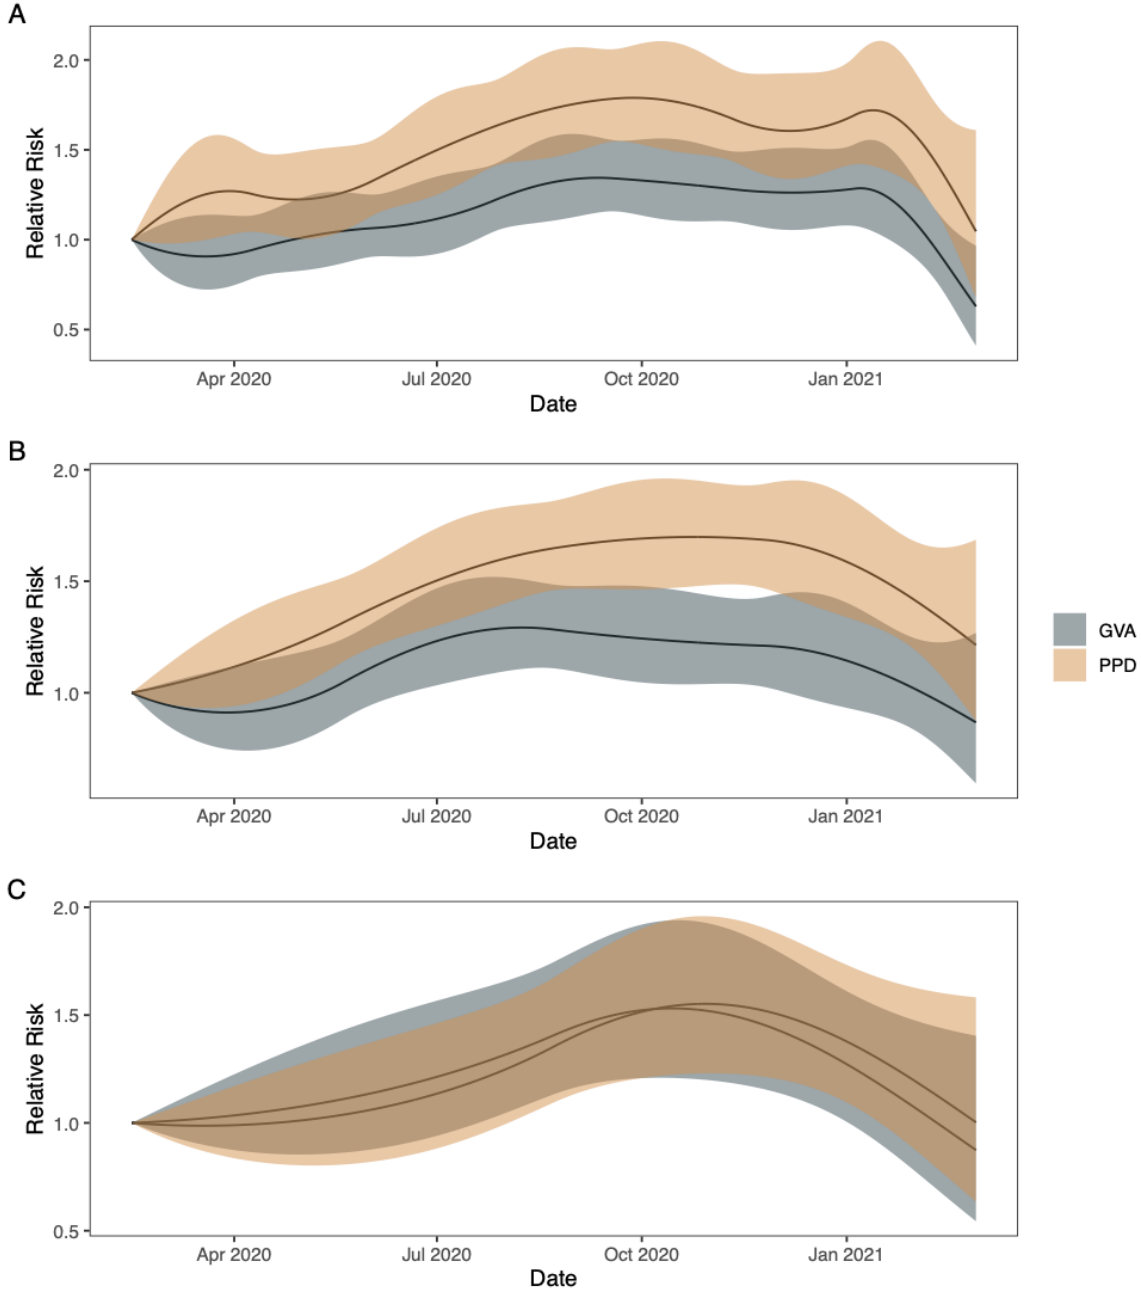

## eReference

1. Johns Hopkins University Center for Systems Science and Engineering. COVID-19 Data Repository by the Center for Systems Science and Engineering (CSSE) at Johns Hopkins University. <https://github.com/CSSEGISandData/COVID-19>. Published 2021. Accessed May 11, 2021, 2021.
2. Boston University School of Public Health. COVID-19 US State Policies (CUSP). <https://www.bu.edu/sph/news/articles/2021/new-website-tracks-compares-us-state-covid-policies/>. Published 2021. Accessed May 11, 2021, 2021.
3. Michael Siegel. State firearm laws. <https://www.statefirearmlaws.org/national-data>. Published 2018. Accessed May 10, 2021, 2021.
4. FBI. NICS firearm checks: month/year by state/type. [https://www.fbi.gov/file-repository/nics\\_firearm\\_checks\\_-\\_month\\_year\\_by\\_state\\_type.pdf/view](https://www.fbi.gov/file-repository/nics_firearm_checks_-_month_year_by_state_type.pdf/view). Published 2021. Accessed May 11, 2021, 2021.
5. US Bureau of Labor. Table 1. Civilian labor force and unemployment by state and selected area, seasonally adjusted. <https://www.bls.gov/news.release/laus.t01.htm>. Published 2021. Accessed May 10, 2021, 2021.
6. Siegel M, Pahn M, Xuan Z, et al. Firearm-related laws in all 50 US states, 1991–2016. *American Journal of Public Health (ajph)*. 2017.
7. Azad HA, Monuteaux MC, Rees CA, et al. Child access prevention firearm laws and firearm fatalities among children aged 0 to 14 years, 1991-2016. *JAMA pediatrics*. 2020;174(5):463-469.
8. Knopov A, Siegel M, Xuan Z, Rothman EF, Cronin SW, Hemenway D. The impact of state firearm laws on homicide rates among black and white populations in the United States, 1991–2016. *Health & social work*. 2019;44(4):232-240.
9. Raifman J, Nocka K, Jones D, et al. COVID-19 US state policy database. [www.tinyurl.com/statepolicies](http://www.tinyurl.com/statepolicies). Published 2020. Accessed.
10. Sera F, Armstrong B, Tobias A, et al. How urban characteristics affect vulnerability to heat and cold: a multi-country analysis. *Int J Epidemiol*. 2019;48(4):1101-1112. doi:10.1093/ije/dyz008
